# Supplementary material
Source: PubMed Central journal article supplement (PMC7125665)
Supplement: mmc2.pdf [file mmc2.pdf]

# Supplementary Figure 2

DiSano

B cells during viral encephalomyelitis

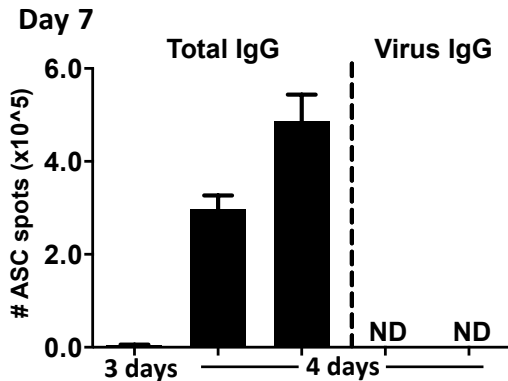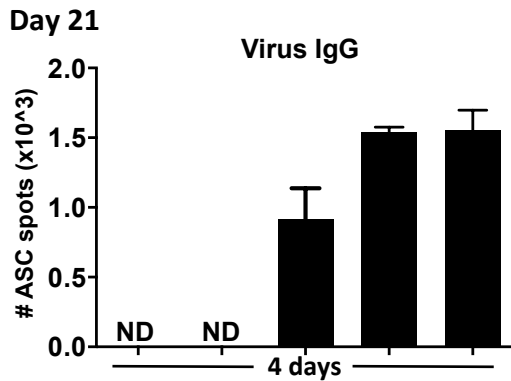

|             |   |   |   |   |   |
|-------------|---|---|---|---|---|
| Feeders     | + | + | + | + | + |
| Brain cells | + | + | + | + | + |
| CD40L+IL-4  | - | - | + | - | + |
| LPS+IL-4    | + | + | - | + | - |

|   |   |   |   |   |
|---|---|---|---|---|
| + | + | + | + | + |
| - | - | + | + | + |
| - | + | - | - | + |
| + | - | - | + | - |
