# Supplementary material
Source: PubMed Central journal article supplement (PMC7125665)

# Supplementary Figure 1

DiSano

B cells during viral encephalomyelitis

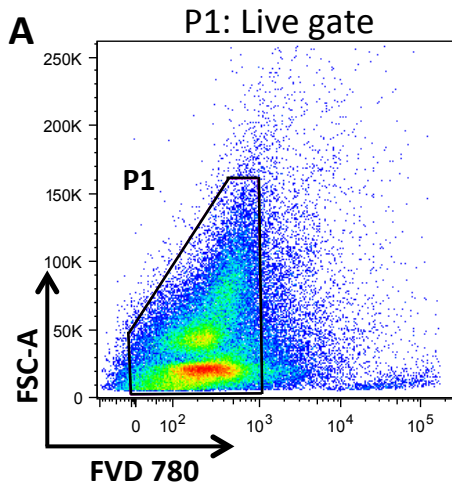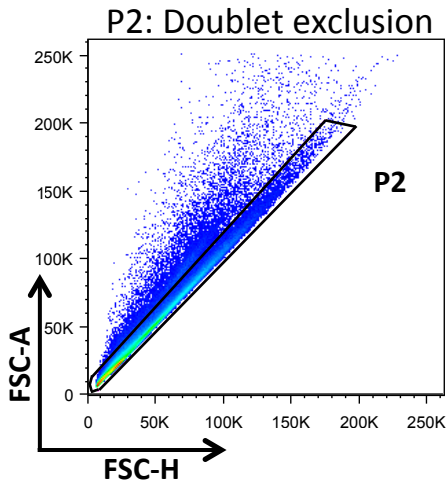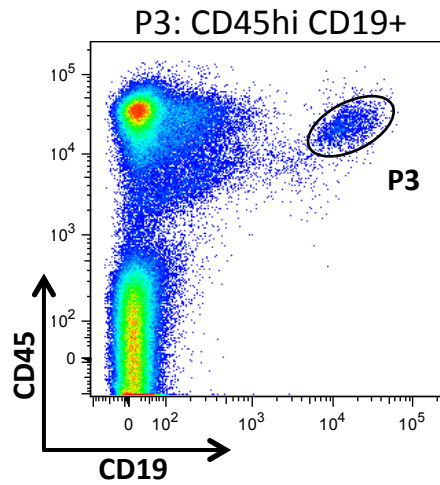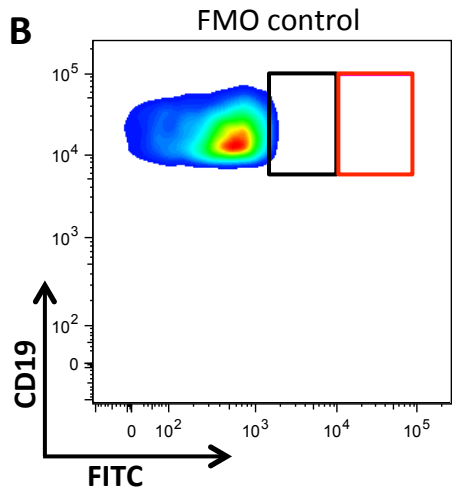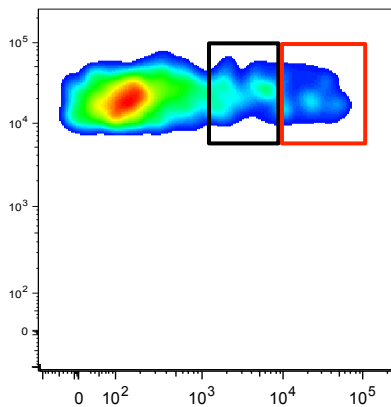

Supplement: mmc1.pdf [file mmc1.pdf]
